# Supplementary material
Source: publisher figshare collection journal article supplement (https://acs.figshare.com/ndownloader/files/12965255)
Supplement: Supplementary file 1 [file 12965255]

Supporting Information

# The Evolving State of Continuous Processing in Pharmaceutical Manufacturing: A Survey of Pharmaceutical Companies and Contract Manufacturing Organizations

*J. Christopher McWilliams,<sup>\*†</sup> Ayman D. Allian,<sup>‡</sup> Suzanne M. Opalka,<sup>§</sup> Scott A. May,<sup>||</sup> Michel Journet,<sup>⊥</sup>  
Timothy M. Braden<sup>||</sup>*

<sup>†</sup>Chemical Research and Development, Pfizer Worldwide Research and Development, Eastern Point Road, Groton, Connecticut 06340, United States

<sup>‡</sup>Department of Pivotal Drug Substance Technologies, Amgen Inc., One Amgen Center Drive, Thousand Oaks, CA 91320, United States

<sup>§</sup>Chemical Process Development, Biogen Idec, 115 Broadway, Cambridge, MA 02142, United States

<sup>||</sup>Small Molecule Design and Development, Eli Lilly and Company, Indianapolis, Indiana 46285, United States

<sup>⊥</sup>API Chemistry, GSK, 709 Swedeland Rd, UW2810, P.O. Box 1539, King of Prussia, PA 19406, United States

The survey was conducted using Survey Monkey ([www.surveymonkey.com](http://www.surveymonkey.com)), a link to which was sent to all participants. The following is a printout of the survey.

### Section A: Personnel Information

3 / 11

27%

**3. Do you have a team of people (chemists/engineers) that dedicates greater than 50% of their time to pharmaceutical continuous manufacturing?**

- ☐ Yes
- ☐ No

**4. What is the total size of the group that dedicates greater than 50% of their time to pharmaceutical continuous manufacturing?**

- ☐ 1-5 people (chemists/engineers)
- ☐ 6-10 people (chemists/engineers)
- ☐ >10 people (chemists/engineers)

**5. If you don't have a dedicated team, what number of people (chemists/engineers) at your organization have experience (greater than 2 projects) developing a continuous process?**

---

- ☐ 1-5 people (chemists/engineers)
- ☐ 6-10 people (chemists/engineers)
- ☐ 11-20 people (chemists/engineers)
- ☐ >20 people (chemists/engineers)
- ☐ Comment

**6. Please select the percentage of people which fall into the following categories.**

|                                                                                   | No Degree            | Bachelors Degree     | Masters Degree       | PhD                  |
|-----------------------------------------------------------------------------------|----------------------|----------------------|----------------------|----------------------|
| People dedicated greater than 90% of their time to Continuous Process development | <input type="text"/> | <input type="text"/> | <input type="text"/> | <input type="text"/> |
| People dedicated 50-89% of their time to Continuous Process development           | <input type="text"/> | <input type="text"/> | <input type="text"/> | <input type="text"/> |
| People dedicated 5-50% of their time to Continuous Process development            | <input type="text"/> | <input type="text"/> | <input type="text"/> | <input type="text"/> |

Each entry consisted of a drop-down with the following options:  
< 10%, 11-25%, 26-50%, 51-75%, >75%

**7. Please reflect on the composition of a typical team you might assign to a project. Indicate how many people with each educational background are assigned to the project.**

|                  | No Degree            | Bachelors Degree     | Masters Degree       | PhD                  |
|------------------|----------------------|----------------------|----------------------|----------------------|
| Process Chemists | <input type="text"/> | <input type="text"/> | <input type="text"/> | <input type="text"/> |

Each entry consisted of a drop-down with the following options:  
1, 2, 3, 4, >=5

|                      | No Degree            | Bachelors Degree     | Masters Degree       | PhD                  |
|----------------------|----------------------|----------------------|----------------------|----------------------|
| Analytical Chemists  | <input type="text"/> | <input type="text"/> | <input type="text"/> | <input type="text"/> |
| Process Engineers    | <input type="text"/> | <input type="text"/> | <input type="text"/> | <input type="text"/> |
| Automation Engineers | <input type="text"/> | <input type="text"/> | <input type="text"/> | <input type="text"/> |
| Project Managers     | <input type="text"/> | <input type="text"/> | <input type="text"/> | <input type="text"/> |
| Technicians          | <input type="text"/> | <input type="text"/> | <input type="text"/> | <input type="text"/> |

#### 8. Comments on Section A: Personnel Information/Staff Resourcing Approach

Prev

Next

## Section B: Equipment Experience - Continuous Reaction Infrastructure

4 / 11

36%

Do you have continuous processing capabilities in any the following areas? When responding, use the following scale of 0-3 and select as many boxes per row as necessary.

0 = No capability

1 = Have capability

2 = Extensive Use (Used for at least 2 projects in last 3 years)

3 = GMP Qualified

### 9. Please respond for Plug Flow Reactor - Heated liquid only.

|           | 0                        | 1                        | 2                        | 3                        |
|-----------|--------------------------|--------------------------|--------------------------|--------------------------|
| < 1 kg    | <input type="checkbox"/> | <input type="checkbox"/> | <input type="checkbox"/> | <input type="checkbox"/> |
| 1 - 20 kg | <input type="checkbox"/> | <input type="checkbox"/> | <input type="checkbox"/> | <input type="checkbox"/> |
| > 20 kg   | <input type="checkbox"/> | <input type="checkbox"/> | <input type="checkbox"/> | <input type="checkbox"/> |

**10. Please respond for Plug Flow Reactor - Heated liquid only.**

&lt; 1 kg

Pressure range:

&lt; 1 kg

Temperature max:

1 - 20 kg

Pressure range:

1 - 20 kg

Temperature max:

&gt; 20 kg

Pressure range:

&gt; 20 kg

Temperature max:**11. Please respond for Plug Flow Reactor - Cryogenic liquid only.**

|           | 0                        | 1                        | 2                        | 3                        |
|-----------|--------------------------|--------------------------|--------------------------|--------------------------|
| < 1 kg    | <input type="checkbox"/> | <input type="checkbox"/> | <input type="checkbox"/> | <input type="checkbox"/> |
| 1 - 20 kg | <input type="checkbox"/> | <input type="checkbox"/> | <input type="checkbox"/> | <input type="checkbox"/> |
| > 20 kg   | <input type="checkbox"/> | <input type="checkbox"/> | <input type="checkbox"/> | <input type="checkbox"/> |

**12. Please respond for Plug Flow Reactor - Cryogenic liquid only.**

&lt; 1 kg

Temperature minimum:

1 - 20 kg

Temperature minimum:

> 20 kg Temperature minimum:

**13. Please respond for Packed-Bed Reactor (solid/liquid or solid/liquid/gas).**

|           | 0                        | 1                        | 2                        | 3                        |
|-----------|--------------------------|--------------------------|--------------------------|--------------------------|
| < 1 kg    | <input type="checkbox"/> | <input type="checkbox"/> | <input type="checkbox"/> | <input type="checkbox"/> |
| 1 - 20 kg | <input type="checkbox"/> | <input type="checkbox"/> | <input type="checkbox"/> | <input type="checkbox"/> |
| > 20 kg   | <input type="checkbox"/> | <input type="checkbox"/> | <input type="checkbox"/> | <input type="checkbox"/> |

**14. Please respond for Packed-Bed Reactor (solid/liquid or solid/liquid/gas).**

< 1 kg

Pressure range:

< 1 kg

Temperature:

< 1 kg

Gases Used:

1 - 20 kg

Pressure range:

1 - 20 kg

Temperature:

1 - 20 kg

Gases Used:

> 20 kg

Pressure range:

> 20 kg

Temperature:

> 20 kg

Gases Used:

**15. Please respond for Plug Flow Reactor (gas/liquid).**

|           | 0                        | 1                        | 2                        | 3                        |
|-----------|--------------------------|--------------------------|--------------------------|--------------------------|
| < 1 kg    | <input type="checkbox"/> | <input type="checkbox"/> | <input type="checkbox"/> | <input type="checkbox"/> |
| 1 - 20 kg | <input type="checkbox"/> | <input type="checkbox"/> | <input type="checkbox"/> | <input type="checkbox"/> |
| > 20 kg   | <input type="checkbox"/> | <input type="checkbox"/> | <input type="checkbox"/> | <input type="checkbox"/> |

**16. Please respond for Plug Flow Reactor (gas/liquid).**

< 1 kg

Pressure range:

< 1 kg

Temperature:

< 1 kg

Gases Used (List):



1 - 20 kg

Pressure range:


1 - 20 kg

Temperature:


1 - 20 kg

Gases Used (List):


&gt; 20 kg

Pressure range:


&gt; 20 kg

Temperature:


&gt; 20 kg

Gases Used (List):

**17. Please respond for CSTR - Low pressure.**

|           | 0                        | 1                        | 2                        | 3                        |
|-----------|--------------------------|--------------------------|--------------------------|--------------------------|
| < 1 kg    | <input type="checkbox"/> | <input type="checkbox"/> | <input type="checkbox"/> | <input type="checkbox"/> |
| 1 - 20 kg | <input type="checkbox"/> | <input type="checkbox"/> | <input type="checkbox"/> | <input type="checkbox"/> |
| > 20 kg   | <input type="checkbox"/> | <input type="checkbox"/> | <input type="checkbox"/> | <input type="checkbox"/> |

**18. Please respond for CSTR - Low pressure.**

&lt; 1 kg

Range:

1 - 20 kg

Range:

> 20 kg

Range:

**19. Please respond for CSTR - High pressure.**

|           | 0                        | 1                        | 2                        | 3                        |
|-----------|--------------------------|--------------------------|--------------------------|--------------------------|
| < 1 kg    | <input type="checkbox"/> | <input type="checkbox"/> | <input type="checkbox"/> | <input type="checkbox"/> |
| 1 - 20 kg | <input type="checkbox"/> | <input type="checkbox"/> | <input type="checkbox"/> | <input type="checkbox"/> |
| > 20 kg   | <input type="checkbox"/> | <input type="checkbox"/> | <input type="checkbox"/> | <input type="checkbox"/> |

**20. Please respond for CSTR - High pressure.**

< 1 kg

Range:

1 - 20 kg

Range:

> 20 kg

Range:

**21. Do you make, design and modify your own continuous reactor setups?**

☐ Yes

☐ No

Please specify reactor types you modify (e.g., plug flow reactor heated, packed-bed reactor).

**22. What level of detail do you provide about your reactor design to your customers?**

- ☐ Full P&ID (Process and Instrumentation Diagram)
- ☐ Simplified P&ID (Process and Instrumentation Diagram)
- ☐ Basic reactor dimensions and configuration
- ☐ No information provided

**23. Do you have commercially available continuous reactor equipment? Please identify the equipment type (not to include makes and models) and at what scale of development they are used: < 1kg; 1 - 20 kg; > 20 kg**

Type 1:

Type 2:

Type 3:

Type 4:

**24. What types of pumps to you use?**

**25. What methods do you use to measure and control mass flow rates?**

**26. Do you have demonstrated use with high potency pharmaceutical compounds? If yes, please describe. Please include number of examples, number of runs, and threshold limits for exposure.**

**27. Comments on Section B: Equipment Experience - Continuous Reaction Infrastructure**

Prev

Next

## Section C: Supported Chemistries

5 / 11

45%

**28. Have you ever carried out any of the following reactions on a continuous basis? Please check as many boxes as needed.**

|                           | < 1 kg                   | 1-100 kg                 | > 100 kg                 | GMP Experience           |
|---------------------------|--------------------------|--------------------------|--------------------------|--------------------------|
| Photochemical Reactions   | <input type="checkbox"/> | <input type="checkbox"/> | <input type="checkbox"/> | <input type="checkbox"/> |
| Electrochemical Reactions | <input type="checkbox"/> | <input type="checkbox"/> | <input type="checkbox"/> | <input type="checkbox"/> |
| Ozonolysis                | <input type="checkbox"/> | <input type="checkbox"/> | <input type="checkbox"/> | <input type="checkbox"/> |
| General oxidations        | <input type="checkbox"/> | <input type="checkbox"/> | <input type="checkbox"/> | <input type="checkbox"/> |
| Fluorination              | <input type="checkbox"/> | <input type="checkbox"/> | <input type="checkbox"/> | <input type="checkbox"/> |
| Diazomethane              | <input type="checkbox"/> | <input type="checkbox"/> | <input type="checkbox"/> | <input type="checkbox"/> |
| Azides                    | <input type="checkbox"/> | <input type="checkbox"/> | <input type="checkbox"/> | <input type="checkbox"/> |

|                              | < 1 kg                   | 1-100 kg                 | > 100 kg                 | GMP Experience           |
|------------------------------|--------------------------|--------------------------|--------------------------|--------------------------|
| Hydrazine                    | <input type="checkbox"/> | <input type="checkbox"/> | <input type="checkbox"/> | <input type="checkbox"/> |
| Nitration                    | <input type="checkbox"/> | <input type="checkbox"/> | <input type="checkbox"/> | <input type="checkbox"/> |
| Organolithiation             | <input type="checkbox"/> | <input type="checkbox"/> | <input type="checkbox"/> | <input type="checkbox"/> |
| Nitroalkane reactions        | <input type="checkbox"/> | <input type="checkbox"/> | <input type="checkbox"/> | <input type="checkbox"/> |
| CN (Strecker/Bucherer-Bergs) | <input type="checkbox"/> | <input type="checkbox"/> | <input type="checkbox"/> | <input type="checkbox"/> |
| Phosgene                     | <input type="checkbox"/> | <input type="checkbox"/> | <input type="checkbox"/> | <input type="checkbox"/> |
| Ammonia                      | <input type="checkbox"/> | <input type="checkbox"/> | <input type="checkbox"/> | <input type="checkbox"/> |
| Hydroformylation             | <input type="checkbox"/> | <input type="checkbox"/> | <input type="checkbox"/> | <input type="checkbox"/> |
| Cabonylation                 | <input type="checkbox"/> | <input type="checkbox"/> | <input type="checkbox"/> | <input type="checkbox"/> |
| Hydrogenation                | <input type="checkbox"/> | <input type="checkbox"/> | <input type="checkbox"/> | <input type="checkbox"/> |
| Aerobic oxidation            | <input type="checkbox"/> | <input type="checkbox"/> | <input type="checkbox"/> | <input type="checkbox"/> |
| Cyclopropanation             | <input type="checkbox"/> | <input type="checkbox"/> | <input type="checkbox"/> | <input type="checkbox"/> |
| Grignard/Barbier reaction    | <input type="checkbox"/> | <input type="checkbox"/> | <input type="checkbox"/> | <input type="checkbox"/> |

**29. List other continuous chemistries you've worked on and indicate as above:**

- < 1 kg
- 1-100 kg
- > 100 kg
- G M P E x p e r i e n c e

|                           |                      |
|---------------------------|----------------------|
| Chemical transformation 1 | <input type="text"/> |
| Chemical transformation 2 | <input type="text"/> |
| Chemical transformation 3 | <input type="text"/> |

Chemical  
transformation 4

### 30. Comments on Section C: Supported Chemistries

Prev

Next

## Section D: Post Reaction Processing

6 / 11

55%

Do you have continuous post-reaction processing capabilities in any the following area? When responding, use the following scale of 0-3 and select as many boxes per row as necessary.

0 = No capability

1 = Have capability

2 = Extensive Use (Used for at least 2 projects in last 3 years)

3 = GMP Qualified

### 31. Please respond for SMB Chromatography.

|           | 0                        | 1                        | 2                        | 3                        |
|-----------|--------------------------|--------------------------|--------------------------|--------------------------|
| < 1 kg    | <input type="checkbox"/> | <input type="checkbox"/> | <input type="checkbox"/> | <input type="checkbox"/> |
| 1 - 20 kg | <input type="checkbox"/> | <input type="checkbox"/> | <input type="checkbox"/> | <input type="checkbox"/> |
| > 20 kg   | <input type="checkbox"/> | <input type="checkbox"/> | <input type="checkbox"/> | <input type="checkbox"/> |

### 32. Please respond for Continuous Separation and Extraction.



|           | 0                        | 1                                   | 2                        | 3                        |
|-----------|--------------------------|-------------------------------------|--------------------------|--------------------------|
| < 1 kg    | <input type="checkbox"/> | <input type="checkbox"/>            | <input type="checkbox"/> | <input type="checkbox"/> |
| 1 - 20 kg | <input type="checkbox"/> | <input checked="" type="checkbox"/> | <input type="checkbox"/> | <input type="checkbox"/> |
| > 20 kg   | <input type="checkbox"/> | <input type="checkbox"/>            | <input type="checkbox"/> | <input type="checkbox"/> |

**33. Please respond for Continuous Distillation.**

|           | 0                        | 1                        | 2                        | 3                        |
|-----------|--------------------------|--------------------------|--------------------------|--------------------------|
| < 1 kg    | <input type="checkbox"/> | <input type="checkbox"/> | <input type="checkbox"/> | <input type="checkbox"/> |
| 1 - 20 kg | <input type="checkbox"/> | <input type="checkbox"/> | <input type="checkbox"/> | <input type="checkbox"/> |
| > 20 kg   | <input type="checkbox"/> | <input type="checkbox"/> | <input type="checkbox"/> | <input type="checkbox"/> |

**34. Please respond for Packed Column Scavenging.**

|           | 0                        | 1                        | 2                        | 3                        |
|-----------|--------------------------|--------------------------|--------------------------|--------------------------|
| < 1 kg    | <input type="checkbox"/> | <input type="checkbox"/> | <input type="checkbox"/> | <input type="checkbox"/> |
| 1 - 20 kg | <input type="checkbox"/> | <input type="checkbox"/> | <input type="checkbox"/> | <input type="checkbox"/> |
| > 20 kg   | <input type="checkbox"/> | <input type="checkbox"/> | <input type="checkbox"/> | <input type="checkbox"/> |

**35. Please respond for Continuous Crystallizations.**

|           | 0                        | 1                        | 2                        | 3                        |
|-----------|--------------------------|--------------------------|--------------------------|--------------------------|
| < 1 kg    | <input type="checkbox"/> | <input type="checkbox"/> | <input type="checkbox"/> | <input type="checkbox"/> |
| 1 - 20 kg | <input type="checkbox"/> | <input type="checkbox"/> | <input type="checkbox"/> | <input type="checkbox"/> |
| > 20 kg   | <input type="checkbox"/> | <input type="checkbox"/> | <input type="checkbox"/> | <input type="checkbox"/> |

**36. Comments on Post Reaction Processing Section**

**37. Please indicate the types of continuous filtration methods used.**

Continuous filtration

1:

Continuous filtration

2:

Continuous filtration

3:

**38. Please respond for your Continuous filtration method 1 using the 0-3 scale as above.**

|           | 0                        | 1                        | 2                        | 3                        |
|-----------|--------------------------|--------------------------|--------------------------|--------------------------|
| < 1 kg    | <input type="checkbox"/> | <input type="checkbox"/> | <input type="checkbox"/> | <input type="checkbox"/> |
| 1 - 20 kg | <input type="checkbox"/> | <input type="checkbox"/> | <input type="checkbox"/> | <input type="checkbox"/> |
| > 20 kg   | <input type="checkbox"/> | <input type="checkbox"/> | <input type="checkbox"/> | <input type="checkbox"/> |

**39. Please respond for your Continuous filtration method 2 using the 0-3 scale as above.**

|           | 0                        | 1                        | 2                        | 3                        |
|-----------|--------------------------|--------------------------|--------------------------|--------------------------|
| < 1 kg    | <input type="checkbox"/> | <input type="checkbox"/> | <input type="checkbox"/> | <input type="checkbox"/> |
| 1 - 20 kg | <input type="checkbox"/> | <input type="checkbox"/> | <input type="checkbox"/> | <input type="checkbox"/> |
| > 20 kg   | <input type="checkbox"/> | <input type="checkbox"/> | <input type="checkbox"/> | <input type="checkbox"/> |

**40. Please respond for your Continuous filtration method 3 using the 0-3 scale as above.**

|           | 0                        | 1                        | 2                        | 3                        |
|-----------|--------------------------|--------------------------|--------------------------|--------------------------|
| < 1 kg    | <input type="checkbox"/> | <input type="checkbox"/> | <input type="checkbox"/> | <input type="checkbox"/> |
| 1 - 20 kg | <input type="checkbox"/> | <input type="checkbox"/> | <input type="checkbox"/> | <input type="checkbox"/> |
| > 20 kg   | <input type="checkbox"/> | <input type="checkbox"/> | <input type="checkbox"/> | <input type="checkbox"/> |

**41. Comments on Continuous filtration methods section.**

|  |
|--|
|  |
|--|

**42. Please indicate the types of continuous drying method used.**

Continuous drying  
method 1:

|  |
|--|
|  |
|--|

Continuous drying  
method 2:

|  |
|--|
|  |
|--|

Continuous drying  
method 3:

|  |
|--|
|  |
|--|

**43. Please respond for your Continuous drying method 1 using the 0-3 scale as above.**

|           | 0                        | 1                        | 2                        | 3                        |
|-----------|--------------------------|--------------------------|--------------------------|--------------------------|
| < 1 kg    | <input type="checkbox"/> | <input type="checkbox"/> | <input type="checkbox"/> | <input type="checkbox"/> |
| 1 - 20 kg | <input type="checkbox"/> | <input type="checkbox"/> | <input type="checkbox"/> | <input type="checkbox"/> |
| > 20 kg   | <input type="checkbox"/> | <input type="checkbox"/> | <input type="checkbox"/> | <input type="checkbox"/> |

**44. Please respond for your Continuous drying method 2 using the 0-3 scale as above.**

|           | 0                        | 1                        | 2                        | 3                        |
|-----------|--------------------------|--------------------------|--------------------------|--------------------------|
| < 1 kg    | <input type="checkbox"/> | <input type="checkbox"/> | <input type="checkbox"/> | <input type="checkbox"/> |
| 1 - 20 kg | <input type="checkbox"/> | <input type="checkbox"/> | <input type="checkbox"/> | <input type="checkbox"/> |
| > 20 kg   | <input type="checkbox"/> | <input type="checkbox"/> | <input type="checkbox"/> | <input type="checkbox"/> |

**45. Please respond for your Continuous drying method 3 using the 0-3 scale as above.**

|           | 0                        | 1                        | 2                        | 3                        |
|-----------|--------------------------|--------------------------|--------------------------|--------------------------|
| < 1 kg    | <input type="checkbox"/> | <input type="checkbox"/> | <input type="checkbox"/> | <input type="checkbox"/> |
| 1 - 20 kg | <input type="checkbox"/> | <input type="checkbox"/> | <input type="checkbox"/> | <input type="checkbox"/> |
|           | <input type="checkbox"/> | <input type="checkbox"/> | <input type="checkbox"/> | <input type="checkbox"/> |

> 20 kg

0

1

2

3

#### 46. Comments on Continuous drying methods section

#### 47. What is the largest number of unit operations that you have run sequentially as a continuous processing train?

10 g - 1 kg

Largest Number of Continuous Unit Operations (#)

< 1 kg

List example of sequential unit operation run in a processing train

1 - 20 kg

Largest Number of Continuous Unit Operations (#)

1 - 20 kg

List example of sequential unit operation run in a processing train

> 20 kg

Largest Number of Continuous Unit Operations (#)

> 20 kg

List example of sequential unit operation run in a processing train

#### 48. What is your strategy on the use of surge tanks at the stable hold points? What is the desired surge tank capacity? 24 hours? 12 hours? Less? None?

**49. Do you have any integration with drug product manufacturing operations?**

Prev

Next

## Section E: Analytical Capabilities

7 / 11

64%

Please check if you have the following capabilities, using the following scale of 0-3.

0 = No capability

1 = Have capability

2 = Extensive Use (used for at least 2 projects in last 3 years)

3 = GMP Qualified

**50.**

**Off-line or At-line (not coupled to process - manual sample retrieval)**

**Please check if you have the following capabilities using the above scale.**

|                            | 0                        | 1                        | 2                        | 3                        |
|----------------------------|--------------------------|--------------------------|--------------------------|--------------------------|
| Chromatography - HPLC/uPLC | <input type="checkbox"/> | <input type="checkbox"/> | <input type="checkbox"/> | <input type="checkbox"/> |
| Chromatography - GC        | <input type="checkbox"/> | <input type="checkbox"/> | <input type="checkbox"/> | <input type="checkbox"/> |
| Spectroscopy - IR          | <input type="checkbox"/> | <input type="checkbox"/> | <input type="checkbox"/> | <input type="checkbox"/> |

|                           | 0                        | 1                        | 2                        | 3                        |
|---------------------------|--------------------------|--------------------------|--------------------------|--------------------------|
| Spectroscopy - Raman      | <input type="checkbox"/> | <input type="checkbox"/> | <input type="checkbox"/> | <input type="checkbox"/> |
| Spectroscopy - NMR        | <input type="checkbox"/> | <input type="checkbox"/> | <input type="checkbox"/> | <input type="checkbox"/> |
| Spectroscopy - UV/Vis     | <input type="checkbox"/> | <input type="checkbox"/> | <input type="checkbox"/> | <input type="checkbox"/> |
| Other - Refractive Index  | <input type="checkbox"/> | <input type="checkbox"/> | <input type="checkbox"/> | <input type="checkbox"/> |
| Other - Camera            | <input type="checkbox"/> | <input type="checkbox"/> | <input type="checkbox"/> | <input type="checkbox"/> |
| Other - FBRM              | <input type="checkbox"/> | <input type="checkbox"/> | <input type="checkbox"/> | <input type="checkbox"/> |
| Other - Mass Spectrometry | <input type="checkbox"/> | <input type="checkbox"/> | <input type="checkbox"/> | <input type="checkbox"/> |
| Other - pH                | <input type="checkbox"/> | <input type="checkbox"/> | <input type="checkbox"/> | <input type="checkbox"/> |
| Other (not listed)        |                          |                          |                          |                          |
| <div></div>               |                          |                          |                          |                          |

51.

**On-line/In-line (Coupled with process)****Please check if you have the following capabilities using the above scale.**

|                            | 0                        | 1                        | 2                        | 3                        |
|----------------------------|--------------------------|--------------------------|--------------------------|--------------------------|
| Chromatography - HPLC/uPLC | <input type="checkbox"/> | <input type="checkbox"/> | <input type="checkbox"/> | <input type="checkbox"/> |
| Chromatography - GC        | <input type="checkbox"/> | <input type="checkbox"/> | <input type="checkbox"/> | <input type="checkbox"/> |
| Spectroscopy - IR          | <input type="checkbox"/> | <input type="checkbox"/> | <input type="checkbox"/> | <input type="checkbox"/> |
| Spectroscopy - Raman       | <input type="checkbox"/> | <input type="checkbox"/> | <input type="checkbox"/> | <input type="checkbox"/> |
| Spectroscopy - NMR         | <input type="checkbox"/> | <input type="checkbox"/> | <input type="checkbox"/> | <input type="checkbox"/> |
| Spectroscopy - UV/Vis      | <input type="checkbox"/> | <input type="checkbox"/> | <input type="checkbox"/> | <input type="checkbox"/> |
| Other - Refractive Index   | <input type="checkbox"/> | <input type="checkbox"/> | <input type="checkbox"/> | <input type="checkbox"/> |
| Other - Camera             | <input type="checkbox"/> | <input type="checkbox"/> | <input type="checkbox"/> | <input type="checkbox"/> |
| Other - FBRM               | <input type="checkbox"/> | <input type="checkbox"/> | <input type="checkbox"/> | <input type="checkbox"/> |

|                             | 0                        | 1                        | 2                        | 3                        |
|-----------------------------|--------------------------|--------------------------|--------------------------|--------------------------|
| Other - Mass Spectrometry   | <input type="checkbox"/> | <input type="checkbox"/> | <input type="checkbox"/> | <input type="checkbox"/> |
| Other - pH                  | <input type="checkbox"/> | <input type="checkbox"/> | <input type="checkbox"/> | <input type="checkbox"/> |
| Other - Process Temperature | <input type="checkbox"/> | <input type="checkbox"/> | <input type="checkbox"/> | <input type="checkbox"/> |
| Other - Process Pressure    | <input type="checkbox"/> | <input type="checkbox"/> | <input type="checkbox"/> | <input type="checkbox"/> |
| Other (not listed)          |                          |                          |                          |                          |
| <div></div>                 |                          |                          |                          |                          |

## 52. How are analytical methods integrated into process control?

|                              | < 1 kg                   | 1 - 100 kg               | > 100 kg                 | GMP                      |
|------------------------------|--------------------------|--------------------------|--------------------------|--------------------------|
| For Information Only         | <input type="checkbox"/> | <input type="checkbox"/> | <input type="checkbox"/> | <input type="checkbox"/> |
| Approval for Forward Process | <input type="checkbox"/> | <input type="checkbox"/> | <input type="checkbox"/> | <input type="checkbox"/> |
| Feedback Control             | <input type="checkbox"/> | <input type="checkbox"/> | <input type="checkbox"/> | <input type="checkbox"/> |
| Real time Release Testing    | <input type="checkbox"/> | <input type="checkbox"/> | <input type="checkbox"/> | <input type="checkbox"/> |
| Other (please specify)       |                          |                          |                          |                          |
| <div></div>                  |                          |                          |                          |                          |

## 53. Comments on Section E: Analytical Capabilities

Prev

Next



## Section F: Regulatory Interactions

8 / 11

73%

**54. Have you ever contributed to a regulatory filing on a continuous manufacturing process requiring the following?**

|              | Yes                   | No                    |
|--------------|-----------------------|-----------------------|
| INDs         | <input type="radio"/> | <input type="radio"/> |
| NDAAs        | <input type="radio"/> | <input type="radio"/> |
| EOP2 Meeting | <input type="radio"/> | <input type="radio"/> |
| ANDAs        | <input type="radio"/> | <input type="radio"/> |
| NDAAs        | <input type="radio"/> | <input type="radio"/> |

**55. How do you define batch identity for your continuous processes?**

**56. How do you define batch history when feed materials are changing in the middle of a continuous “batch”?**

**57. How do you handle diverting flow during temporary process excursions when process parameters go outside of the range defined in the batch record?**

**58. Do you handle cleaning similar to existing cleaning procedures for pumps and process hoses? How do you verify the system is clean?**

**59. Do you have experience transferring any continuous process technologies to a Pharmaceutical company GMP manufacturing site? If so, please describe any differences from a traditional tech transfer.**

Prev

Next

## Section G: Issues Related to the Adoption of Continuous Manufacturing

9 / 11

82%

**60. Do you provide customers with a recommendation on whether a process should be done continuously?**

☐ Yes

☐ No

**61. What factors go into analyzing whether a process should be done continuously?**

**62. Over the past 5 years what percentage of your business has shifted from batch to continuous?**

**63. Over the next 15 years, what percentage of your business do you expect will shift from batch to continuous?**

**64. With regard to the previous question, are the barriers primarily technical or business challenges?**

☐ Business

☐ Technical

Please provide any comment(s) you may have regarding the shift from batch to continuous and/or the primary barrier as indicated above.

**65. What is your desired balance between developing processes for batch and then converting them over to continuous, versus designing for continuous processes from the beginning?**

**66. If the customer does not specify processing technology and you are a contract manufacturer, what circumstances prompt your consideration of continuous processing technologies?**

**67. Do you have any publications or publically disclosed presentations demonstrating your continuous processing and/or manufacturing experience? If so, please list.**

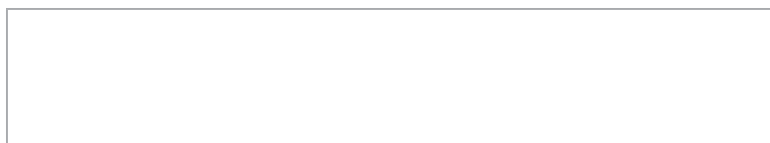

Prev

Next
